# Supplementary material
Source: publisher figshare collection journal article supplement (https://frontiersin.figshare.com/ndownloader/files/15683933)
Supplement: Supplementary file [file 15683933]

Table S1. Sequence analysis of cloned *six Avr* genes in four *Leptosphaeria maculans* isolates.

|                             | <i>L. maculans</i> isolates |       |          |         |
|-----------------------------|-----------------------------|-------|----------|---------|
|                             | 03-42-06                    | 87-41 | 03-15-03 | PG4-1-M |
| <i>AvrLm1<sup>a</sup></i>   |                             |       |          |         |
| Genotype                    | A                           | A     | a        | a       |
| PCR                         | +                           | +     | -        | -       |
| <i>AvrLm2<sup>b</sup></i>   |                             |       |          |         |
| Genotype                    | a                           | A     | A        | a       |
| PCR                         | +                           | +     | +        | +       |
| Nucleotides for 133rd AA    | CAT                         | GGT   | GGT      | AAT     |
| Nucleotides for 146th AA    | CAA                         | GAA   | GAA      | CAA     |
| <i>AvrLm4-7<sup>c</sup></i> |                             |       |          |         |
| Genotype                    | A                           | A     | a        | a       |
| PCR                         | +                           | +     | -        | -       |
| Nucleotides for 80th AA     | ATA                         | ATA   |          |         |
| Nucleotides for 120th AA    | GGC                         | GGC   |          |         |
| <i>AvrLm6<sup>d</sup></i>   |                             |       |          |         |
| Genotype                    | A                           | A     | A        | A       |
| PCR                         | +                           | +     | +        | +       |
| <i>AvrLm11<sup>e</sup></i>  |                             |       |          |         |
| Genotype                    | A                           | A     | A        | A       |
| PCR                         | +                           | +     | +        | +       |
| <i>AvrLm5<sup>f</sup></i>   |                             |       |          |         |
| Genotype                    | A                           | A     | A        | A       |
| PCR                         | +                           | +     | +        | +       |
| Nucleotides for 29th AA     | CGA                         | CGA   | CGA      | CGA     |
| Nucleotides for 38th AA     | CGG                         | CGG   | CGG      | CGG     |
| Nucleotides for 55th AA     | AGA                         | AGA   | AGA      | AAA     |

**a, d and e.** Virulent allele of *AvrLm1*, *AvrLm6* or *AvrLm11* was caused by deletion of the gene; PCR was used to detect the presence/absence of *Avr* genes in four isolates.

**b.** Polymorphic sites (133<sup>rd</sup> and 146<sup>th</sup> amino acids) determining the avirulence/virulence toward *Rlm2* in *AvrLm2*. The nucleotides GGT coding Gly in 133<sup>rd</sup> and GAA coding Glu in 146<sup>th</sup> render the *Avrlm2* complementary and avirulent to *Rlm2* (Ghanbarnia *et al.*, 2015).

**c.** Polymorphic sites (120<sup>th</sup> amino acid) determining the avirulence/virulence toward *Rlm4* in *AvrLm4-7*. The nucleotides GGC coding Gly for the 120<sup>th</sup> render the *AvrLm4-7* complementary and avirulent to *Rlm4* (Blondeau *et al.*, 2015).

**f.** Polymorphic sites (29<sup>th</sup> amino acid) in *AvrLm5* determining the avirulence/virulence toward *B. napus* cultivars . The nucleotide changes from CGA coding Arg for the 29<sup>th</sup> amino acid to TGA coding the premature stop code result in the virulence of *AvrLm5* toward *B. napus* cultivars (Van de Wouw *et al.*, 2014). The polymorphic sites for 38<sup>th</sup> and 55<sup>th</sup> amino acids were also detected.

For genotype indication, ‘A’ means the presence of the functional *Avr* gene while ‘a’ means presence of the non-functional *Avr* gene or the absence of the *Avr* gene. For PCR screening, ‘+’ means the detection of the *Avr* gene by PCR, ‘-’ means the absence of the *Avr* gene in the PCR screening.
